# Supplementary material for: TNF-α inhibits SATB2 expression and osteoblast differentiation through NF-κB and MAPK pathways
Source: PubMed Central journal article supplement (PMC5797016; doi:10.18632/oncotarget.23373), 2017-12-18
Supplement: oncotarget-09-4833-s001.pdf [file oncotarget-09-4833-s001.pdf]

# TNF- $\alpha$ inhibits SATB2 expression and osteoblast differentiation through NF- $\kappa$ B and MAPK pathways

## SUPPLEMENTARY MATERIALS

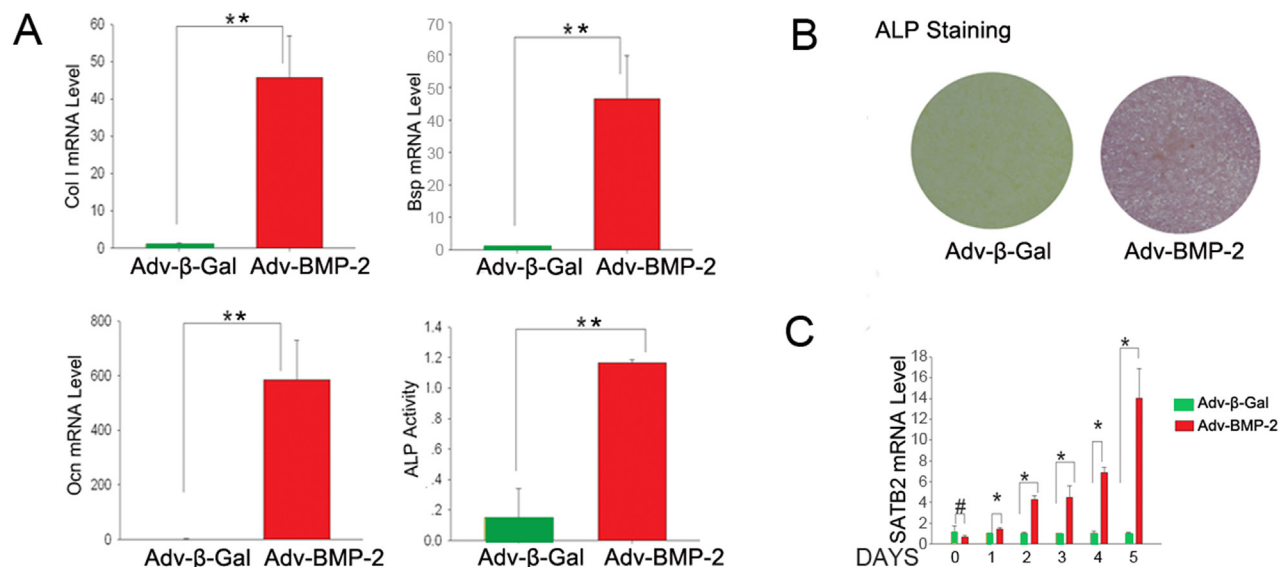

**Supplementary Figure 1: Adv-BMP2 induces C2C12 cells to differentiate into osteoblasts and promotes SATB2 expression.** The C2C12 cells were treated with Adv-BMP2 (150 pfu/cell) or Adv- $\beta$ -Gal (150 pfu/cell) for five days (**A**) The *Col I*, *Bsp*, and *Ocn* mRNA levels were examined. The ALP activity was normalized to the Adv- $\beta$ -Gal group, and (**B**) ALP staining was performed, (**C**) The C2C12 cells were treated with Adv-BMP2 (150 pfu/cell) or Adv- $\beta$ -Gal (150 pfu/cell) for various time points and the *SATB2* gene expressions were assessed via real-time PCR. The fold change was calculated as follows: (relative *Col I*, *Bsp*, *Ocn*, *SATB2* levels in Adv-BMP2-treated sample) / (relative *Col I*, *Bsp*, and *Ocn* levels in Adv- $\beta$ -Gal-treated sample), the data were presented as mean  $\pm$  S.D. ( $n = 3$ ; \* $p < 0.05$ ; \*\* $p < 0.01$ ).

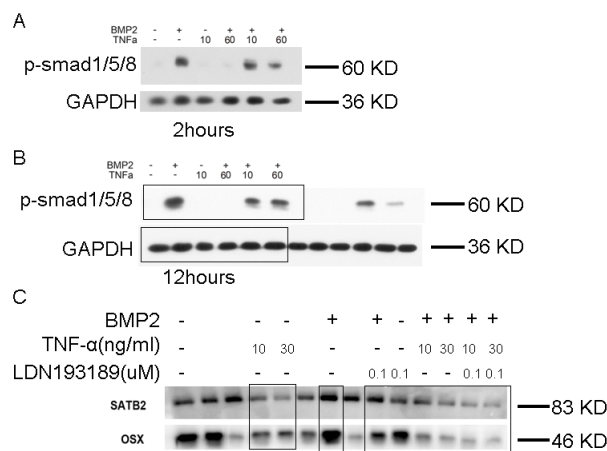

**Supplementary Figure 2: TNF- $\alpha$  inhibits SATB2 expression by inhibiting the smad1/5/8 signaling pathway.** Uncropped western blot images corresponding to Figure 4(A), Figure 4(C) and Figure 4(E).

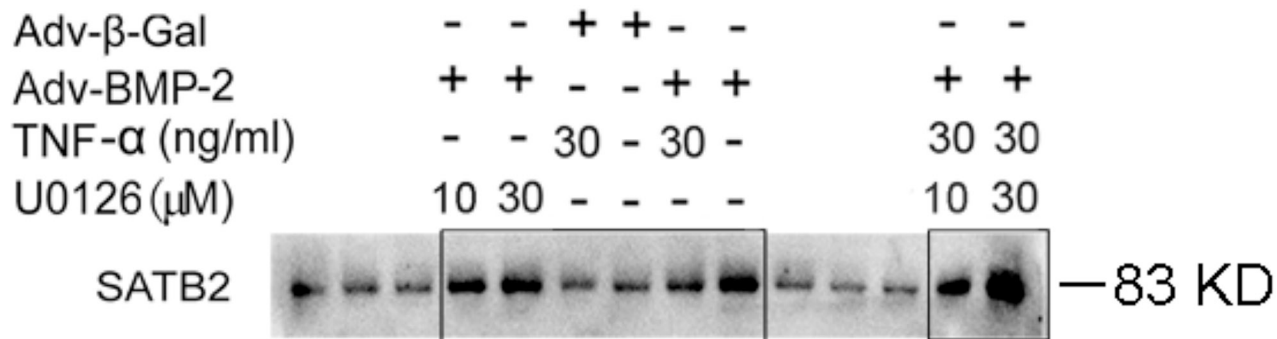

Supplementary Figure 3: TNF-α inhibits SATB2 expression by activating the MAPK signaling pathway. Uncropped western blot images corresponding to Figure 5C.

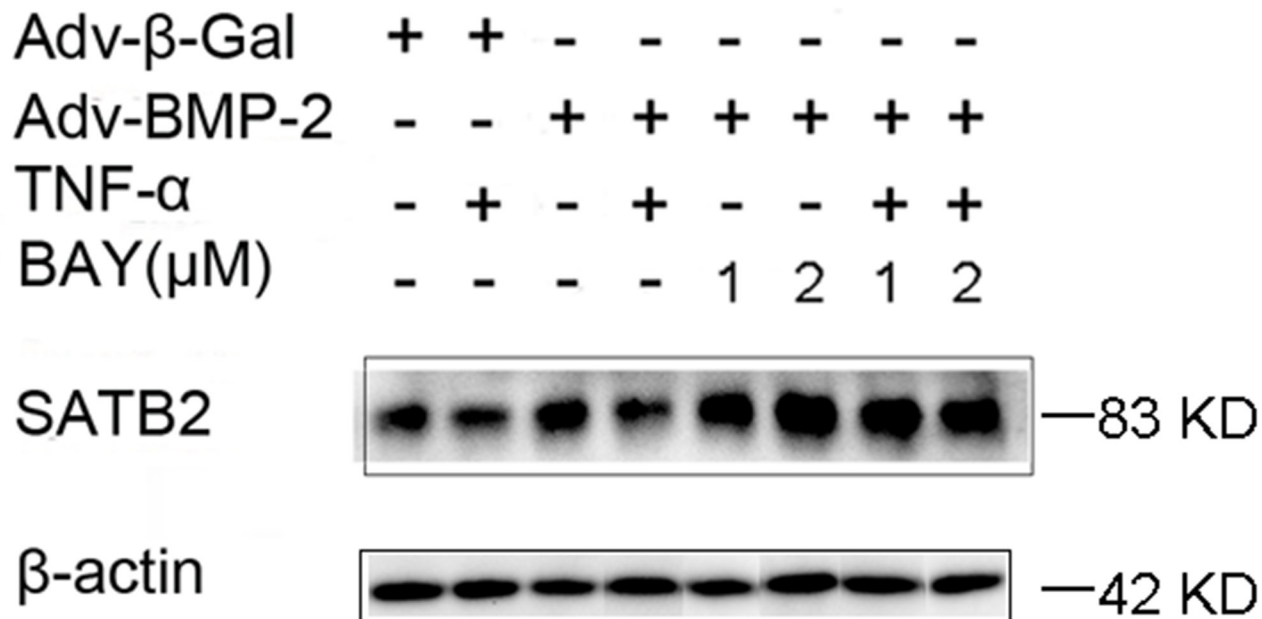

Supplementary Figure 4: TNF-α inhibits SATB2 expression by activating NF-κB. Uncropped western blot images corresponding to Figure 6E.

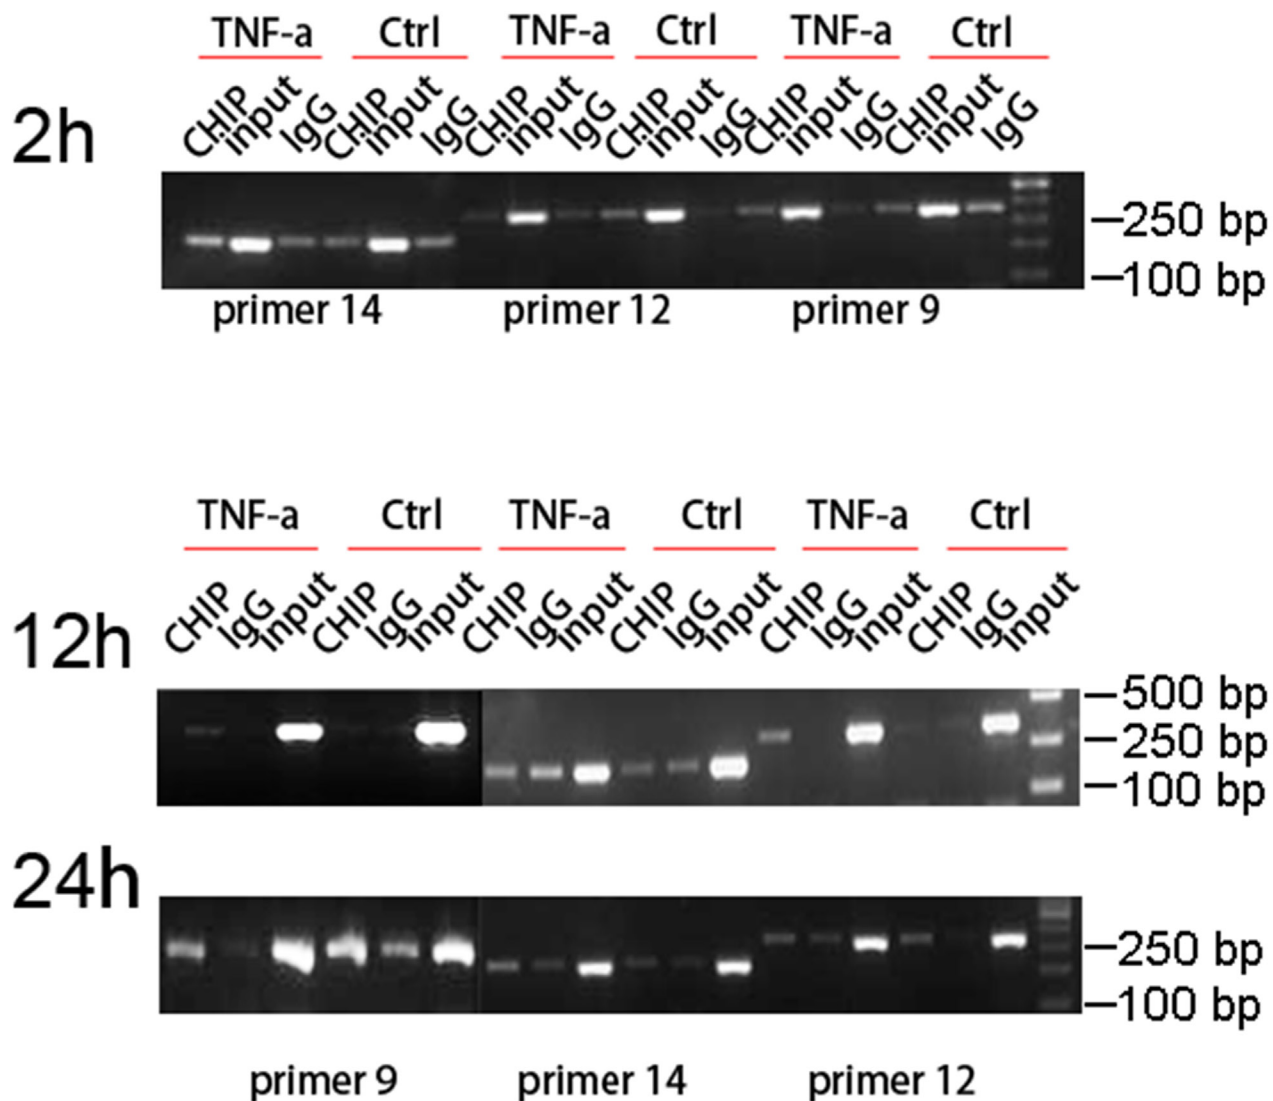

Supplementary Figure 5: TNF-α induced NF-κB directly interacts with SATB2 gene promoter to inhibit its expression. Uncropped RT-PCR images corresponding to Figure 7D.
